# Supplementary material for: Discovery through Machine Learning and Preclinical Validation of Novel Anti-Diabetic Peptides
Source: MDPI journal article supplement (doi:10.3390/biomedicines9030276), 2021-03-09
Supplement: s1 [file s1]

# Discovery through Machine Learning and Preclinical Validation of Novel Anti-Diabetic Peptides

Rory Casey<sup>1</sup>, Alessandro Adelfio<sup>1</sup>, Martin Connolly<sup>1</sup>, Audrey Wall<sup>1\*</sup>, Ian Holyer<sup>1</sup> and Nora Khaldi<sup>1</sup>

<sup>1</sup> Nuritas Ltd, Joshua Dawson House, Dublin 2, D02 RY95, Ireland

\* Correspondence: **Author:** Dr Audrey Wall, PhD ; **Email:** wall.audrey@nuritas.com; **Phone:** +353 1 430 1290

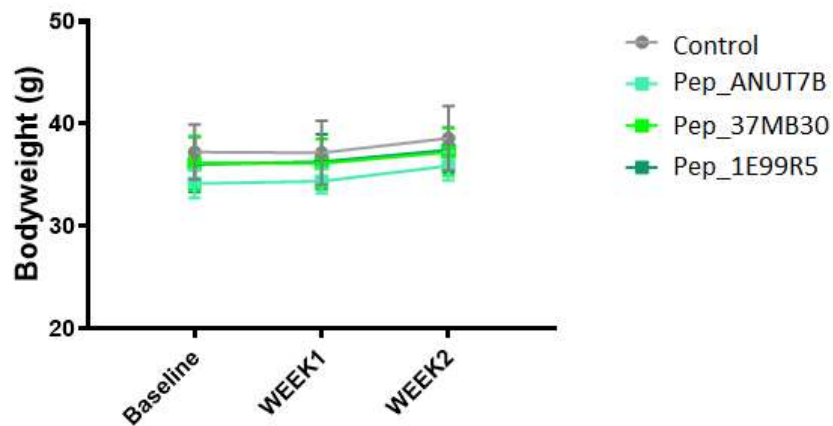

**Figure S1: AI predicted peptides in a mouse model of type 2 diabetes.** Bodyweight (g) of all mice were measured as indicated. Data are mean  $\pm$  SEM (n=8 per group; aged 12 weeks at baseline) and analysed by Tukeys's test to compare the differences of bodyweight within each treatment group over the course of treatment (\*p<0.05 \*\*p<0.01 \*\*\*p<0.001)

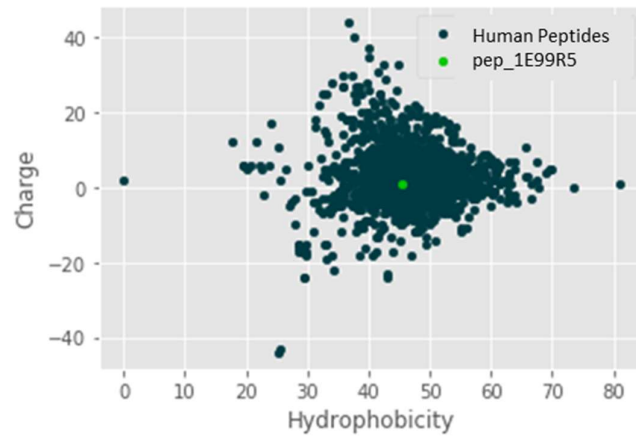

**Figure S2. Property dispersion of AI predicted peptides relative to known endogenous human peptides.**
